# Supplementary material
Source: PubMed Central journal article supplement (PMC2041986)

A

|           |       |            |             |        |          |          |         |        |        |               |               |              |              |              |      |              |   |     |   |
|-----------|-------|------------|-------------|--------|----------|----------|---------|--------|--------|---------------|---------------|--------------|--------------|--------------|------|--------------|---|-----|---|
| AT5G52965 | DLVK  | WSSLFNVEG  | VLEIAKSI    | IFSG   | -----    | KFENVEAA | KAF     | STLDAN | WPHMFP | --            | LNPFPPPLLDKN  | ARI          | VP           |              |      |              |   |     |   |
| AT5G52975 | DLVK  | WSSLFNVEG  | VLEIAKSI    | IFSG   | -----    | KFENVEAA | KAF     | STLDAN | WPHMFP | --            | LNPFPPPLLDKS  | ARI          | VP           |              |      |              |   |     |   |
| AT2G27315 | DLVK  | WSSLFNVEG  | VLEIAKSI    | IFSG   | -----    | KFENIEGA | KAF     | SALDAN | WPEMFP | --            | LNPFPPPLLDKI  | ARI          | VP           |              |      |              |   |     |   |
| AT2G14378 | DVEK  | WSSLFNTQG  | VFELLKSVFSG | -----  | RFGDVGVA | KAF      | STVDAN  | WPHMFP | --     | LNPFPPPLLDKN  | AHI           | VP           |              |              |      |              |   |     |   |
| AT4G35165 | DVEK  | WASLFNTQG  | VFELLKSVFSG | -----  | QFGDVGVA | KAL      | STIDAN  | WPHMFP | --     | LNPFPPPLLDKN  | AHI           | VP           |              |              |      |              |   |     |   |
| AT5G54062 | DLTK  | LSSLVNVQG  | VTEIYKSVFTG | -----  | KCDNVGFM | KAF      | MAVDAK  | WPKMFP | --     | LNPFPPPLLDKNV | SRIN          | T            |              |              |      |              |   |     |   |
| AT5G53742 | DLTK  | LSSLVNVQG  | VTEIYKSVFTG | -----  | KFGNVGVM | KAF      | SAVDVK  | WQPMFP | --     | LNPFPPPLLDKKE | SPI           | NA           |              |              |      |              |   |     |   |
| AT5G36310 | DITK  | FSSVMDIPG  | IAEISQSI    | IFTC   | -----    | KFGNLGPT | KAF     | LDAD-N | IPKIP  | ---           | FIP---        | PMLKEQ       | SRVAG        |              |      |              |   |     |   |
| AT5G36340 | DITK  | FSSVMDIPG  | IAEISQSI    | IFTC   | -----    | KFGNLGPT | KAF     | LDAD-N | IPKIP  | ---           | FIP---        | PMLKEQ       | SRVAG        |              |      |              |   |     |   |
| AT5G36540 | DITK  | FSSVMDIPG  | IAEISQSI    | IFTC   | -----    | KFGNLGPT | KAF     | LDAD-N | IPKIP  | ---           | FIPFPPMLKEQ   | SRVAG        |              |              |      |              |   |     |   |
| AT5G36550 | DITK  | FSSVMDIPG  | IAEISQSI    | IFTC   | -----    | KFGNLGPT | KAF     | LDAD-N | IPKIP  | ---           | FIPFPPMLKEQ   | SRVAG        |              |              |      |              |   |     |   |
| AT5G36360 | DITK  | FSSVMDIPG  | IAEISQSI    | IFTC   | -----    | KFGNLGPA | KAF     | LDAD-N | IPKIP  | ---           | FIPFPPMLKEQ   | SRVAG        |              |              |      |              |   |     |   |
| AT5G36480 | DITK  | FSSVMDIPG  | IAEISQSI    | IFTC   | -----    | KFGNLGPA | KAF     | LDAD-N | IPKIQ  | ---           | FIPFPPMLKEQ   | SRVAG        |              |              |      |              |   |     |   |
| AT5G36470 | DITK  | FSSVMDIPG  | IAEISQSI    | IFTC   | -----    | KFGNLGPA | KAF     | LDAD-N | IPKIP  | ---           | FIPFPPMLKEQ   | SRVAG        |              |              |      |              |   |     |   |
| AT5G36450 | DITK  | FSSVMDIPG  | IAEISQSI    | IFTC   | -----    | KFGNLGPA | KAF     | LDAD-N | IPKIP  | ---           | FIPFPPMLKEQ   | SRVAG        |              |              |      |              |   |     |   |
| AT5G36440 | DITK  | FSSVMDIPG  | IAEISQSI    | IFTC   | -----    | KFGNLGPA | KAF     | LDAD-N | IPKIP  | ---           | FIPFPPMLKEQ   | SRVAG        |              |              |      |              |   |     |   |
| AT5G36340 | DITK  | FSSVMDIPG  | IAEISQSI    | IFTC   | -----    | KFGNLGPA | KAF     | LDAD-N | IPKIP  | ---           | FIPFPPMLKEQ   | SRVAG        |              |              |      |              |   |     |   |
| AT5G36420 | DITK  | FSSVMDIPG  | IAEISQSI    | IFTC   | -----    | KFGNLGPA | KAF     | LDAD-N | IPKIP  | ---           | FIPFPPMLKEQ   | SRVAG        |              |              |      |              |   |     |   |
| AT5G36410 | DITK  | FSSVMDIPG  | IAEISQSI    | IFTC   | -----    | KFGNLGPA | KAF     | LDAD-N | IPKIP  | ---           | FIPFPPMLKEQ   | SRVAG        |              |              |      |              |   |     |   |
| AT5G36400 | DITK  | FSSVMDIPG  | IAEISQSI    | IFTC   | -----    | KFGNLGPA | KAF     | LDAD-N | IPKIP  | ---           | FIPFPPMLKEQ   | SRVAG        |              |              |      |              |   |     |   |
| AT5G36390 | DITK  | FSSVMDIPG  | IAEISQSI    | IFTC   | -----    | KFGNLGPA | KAF     | LDAD-N | IPKIP  | ---           | FIPFPPMLKEQ   | SRVAG        |              |              |      |              |   |     |   |
| AT5G36380 | DITK  | FSSVMDIPG  | IAEISQSI    | IFTC   | -----    | KFGNLGPA | KAF     | LDAD-N | IPKIP  | ---           | FIPFPPMLKEQ   | SRVAG        |              |              |      |              |   |     |   |
| AT5G36350 | DITK  | FSSVMDIPG  | IAEISQSI    | IFTC   | -----    | KFGNLGPA | KAF     | LDAD-N | IPKIP  | ---           | FIPFPPMLKEQ   | SRVAG        |              |              |      |              |   |     |   |
| AT5G36460 | DITK  | FSSVMDIPG  | IAEISQSI    | IFTC   | -----    | KFGNLGPA | KAF     | LDAD-N | IPKIP  | ---           | FIPFPPMLKEQ   | SRVAG        |              |              |      |              |   |     |   |
| AT5G36490 | DITK  | FSSVMDIPG  | IAEISQSI    | IFTC   | -----    | KFGNLGPA | KAF     | LDAD-N | IPKIP  | ---           | FIPFPPMLKEK   | SRVAG        |              |              |      |              |   |     |   |
| AT5G36500 | DITK  | FSSVMDIPG  | IAEISQSI    | IFTC   | -----    | KFGNLGPA | KAF     | LDAD-N | IPKIP  | ---           | FIPFPPMLKEK   | SRVAG        |              |              |      |              |   |     |   |
| AT5G36520 | DITK  | FSSVMDIPG  | IAEISQSI    | IFTC   | -----    | KFGNLGPA | KAF     | LDAD-N | IPKIP  | ---           | FIPFPPMLKEQ   | SRVAG        |              |              |      |              |   |     |   |
| AT5G36658 | DITK  | FSSVMDIPG  | IAEISQSI    | IFTC   | -----    | KFGNLGPA | KAF     | LDTD-N | IPKIP  | ---           | FIPFPPMLKEQ   | SRVAG        |              |              |      |              |   |     |   |
| AT5G36657 | DITK  | FSSVMDIPG  | IAEISQSI    | IFTC   | -----    | KFGNLGPA | KAF     | LDTD-N | KPKIP  | ---           | FIPFPPMLKEQ   | SRVAG        |              |              |      |              |   |     |   |
| AT5G36370 | DITK  | FSSVMDIPG  | IAEISQSI    | IFTC   | -----    | KFGNLGPA | KAF     | LDAD-N | IPKIP  | ---           | FIPFPPMLKEQ   | SRVAG        |              |              |      |              |   |     |   |
| AT5G36662 | DITK  | FSSVMDIPG  | IAEISQSI    | IFTR   | -----    | KFGNLGPA | EAF     | VDAD-N | IPKIP  | ---           | LIPFPPSMLKEQ  | SRVAG        |              |              |      |              |   |     |   |
| AT5G36739 | DITK  | FSSVMDIPG  | IAEISQSI    | IFTR   | -----    | KFGNLGPA | EAF     | VDAD-N | IPKIP  | ---           | LIPFPPSMLKEQ  | SRVAG        |              |              |      |              |   |     |   |
| AT3G42565 | DITK  | WSSVMDIPG  | IAEISQSI    | IFTC   | -----    | KFGNLGPA | KAF     | LDAKVN | IPKIP  | ---           | FIPFPPMLKEQ   | SRVAG        |              |              |      |              |   |     |   |
| AT5G36661 | DITK  | FSSVMDIPE  | IAEISQSI    | IFTC   | -----    | KFGNLSA  | KAF     | LDAD-N | IPKIP  | ---           | FIPFPPMLKEQ   | SRVAG        |              |              |      |              |   |     |   |
| AT5G36738 | DITK  | FSSVMDIPE  | IAEISQSI    | IFTC   | -----    | KFGNLSA  | KAF     | LDAD-N | IPKIP  | ---           | FIPFPPMLKEQ   | SRVAG        |              |              |      |              |   |     |   |
| AT5G36659 | DITK  | FSSVMDIPE  | IAEISQSI    | IFTC   | -----    | KFGNLSA  | KAF     | LDAD-N | IPNS   | ---           | FRFFLR        | ----         |              |              |      |              |   |     |   |
| AT5G42895 | DITK  | LSSVMDIPR  | ITEISQSI    | IFIG   | -----    | KFGNLGPA | KAF     | LDAEAN | MPKIP  | ---           | FIPFPPMLKEQ   | SRI          | AG           |              |      |              |   |     |   |
| AT4G09545 | DITK  | WSSVMDIPE  | IAEISQSI    | IFIG   | -----    | KFNSLGS  | KAF     | LDAEAN | IPKIP  | ---           | LIPFPPMLKEQ   | SRI          | AG           |              |      |              |   |     |   |
| AT5G44495 | DITK  | LSSVINIPG  | VEEISQSI    | ILLE   | -----    | KFGIGSA  | KAI     | LEAETN | IQPLP  | ---           | FNPFPPMLKHQ   | S            | KTVG         |              |      |              |   |     |   |
| AT5G51105 | DLSK  | WSTVMDLPG  | VEEIQQA     | VMSC   | -----    | KFEGVGVG | KAF     | LDAEAN | LPNLP  | ---           | SNPFPPMMKHQ   | S            | KMAS         |              |      |              |   |     |   |
| AT2G24205 | DVKK  | FSSVRNVPG  | LLEISQ      | -AFGE  | -----    | KFGHMPPA | KAF     | MDSI-K | MPNIL  | ---           | YSVLPFPPNLKEQ | NQAG         | I            |              |      |              |   |     |   |
| AT5G60945 | HVFR  | YSSVMKFP   | VIQTTS      | SVRNK  | -----    | RW-EISPY | KAY     | LHTKDY | LPKIP  | ---           | YMPKFPSFIRNH  | K            | KVVR         |              |      |              |   |     |   |
| AT5G60964 | RIFK  | YSSVMKFP   | VIETTQS     | VSNR   | -----    | RW-VISPY | KAY     | LHTRDY | LPKIP  | ---           | YMPHFPSFIRNH  | L            | KVVR         |              |      |              |   |     |   |
| AT3G01328 | ----- | ITQVAG     | FNAVRLA     | ADK    | -----    | DSKLLTRV | RVV     | KTLD   | LLLVYP | ---           | DRAYNTYFKGI   | F            | EKFN         |              |      |              |   |     |   |
| AT3G01322 | ----- | IDNVAG     | FDAVRLA     | ADV    | -----    | DIKWLRS  | RD      | KVV    | KTLD   | ---           | LLLVYP        | ---          | NRAYNTLFKFI  | F            | EIFN |              |   |     |   |
| AT3G01327 | ----- | IENVAG     | LDSLRLA     | VHQ    | -----    | DFRLLSRD | KVV     | KTLPD  | LLFLYP | ---           | NIVYNTYFKFN   | F            | LKFN         |              |      |              |   |     |   |
| AT3G01323 | ----- | VANLPG     | FYAVRLA     | ADQ    | -----    | DIRWLS   | RD      | EAV    | KTLPD  | ---           | LLLVYP        | ---          | YKALNTIILKRI | V            | TKFP |              |   |     |   |
| AT3G01331 | ----- | ISRVPG     | FYDALRLA    | AAG    | -----    | DYRWLS   | RD      | RVV    | YATLPD | ---           | FLTLKP        | ---          | DALPINVFRVI  | S            | NTVP |              |   |     |   |
| AT2G21750 | -LMQ  | WDALEYLKS  | TNEIVL      | FFLNG  | -----    | ETKLVG   | N       | VDDVIT | D      | WPA           | MLTSLG        | FTLEETNVLRGF | Q            | ---          |      |              |   |     |   |
| AT2G21740 | -LME  | WNALEYLKS  | TNEIVL      | FFLNG  | -----    | ETKLVG   | Q       | VEVIT  | D      | WPA           | MLTSLG        | FTSDETNVLRGF | Q            | ---          |      |              |   |     |   |
| AT4G39340 | -LME  | WNALEYLKS  | TNEIVL      | FFLNG  | -----    | ETKLVG   | E       | SVDI   | I      | T             | D             | WPA          | MLTSLG       | FTPEEANVLRGF | Q    | ---          |   |     |   |
| AT5G64720 | -LMD  | WNAGLEYLKS | TDEIVK      | FFLSQT | -----    | GIGLVVK  | D       | WS     | VMFT   | S             | LG            | FTLMEGNLRG   | E            | FQAE         |      |              |   |     |   |
| AT1G67650 | DTGCV | WDSLMLQLQH | SCELI       | LF     | FFLNG    | -----    | ETYIGPG | S      | AI     | -RT           | I             | G            | RK           | WPTMIG       | VLG  | FTAQEGDMLQGY | D | GND | S |

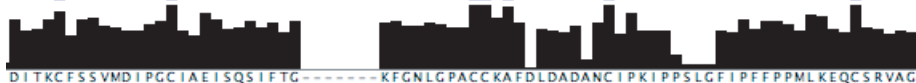

B

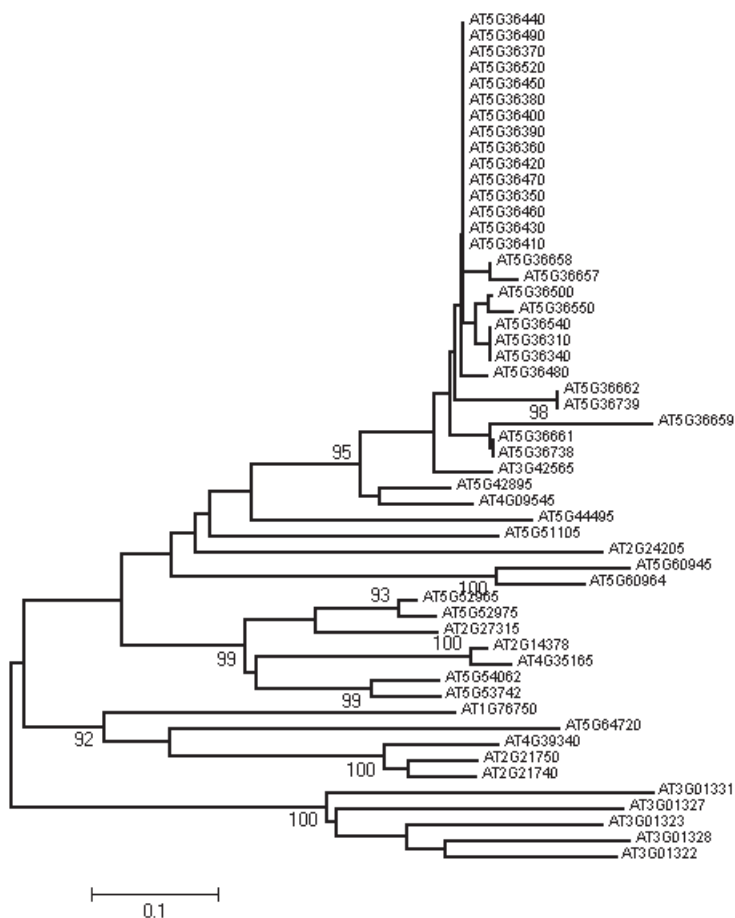

Supplement: pgen.0030171.sg003.pdf [file pgen.0030171.sg003.pdf]
