# Supplementary material
Source: PubMed Central journal article supplement (PMC2041986)
Supplement: pgen.0030171.sg002.pdf [file pgen.0030171.sg002.pdf]

A

AT1G45190 KQLKFLFA CSE P S S K ---- GNEVFKNMLNET --- MPITEE C R D I L K M K D C H L G L V K L I F A T Y E Y K N --- I A S K G I P K S K Q A W N E C I R R V G S K  
 AT3G11990 KQLKFLFA CSE P S S K ---- GNEVFKNMLNET --- MLITEE C R D I L K M K D C H L G L V K L I F A T Y E Y K N --- I A S K G I P K S K Q T W N E C V H R V G S K  
 AT1G47470 KQLDFLEA CSE P S S K ---- GNEVFKNMLDET --- VPITDE C R D I L K M K D C H L G L V K L I F A T Y E Y K N --- K A S K G I P K S K Q T W N E C V F R V G S K  
 AT1G47450 KIPDFIAA AM Q S W I ---- L N V V F E N M K D E M --- M P I I N E C R E I L K M K D C H F R L V E G W S A M V Y V G N S --- I A S K D I P Y S K Q S W N E C V R R V G S K  
 AT4G13263 KVFDFLET A E P S S I ---- G G E I F Q N V L D A T --- T L V T D K C R D I L K I K D C H L G L I K I F F S S Y E Y K N --- I A S --- I P R S K Q T W N D C F R R V G S K  
 AT4G13261 KQYDFLEA C V E P S S I ---- G G E I F Q N V L D A T --- T L V T D K C R D I L K I K D C H L G L I K I F F S S Y E Y K N --- I A S --- I P R N K Q T W N D C L R R V G S K  
 AT5G35405 KQYDFLEA C V E P S S I ---- G G E I F Q N V L D E T --- N L V T D K C R N I L K I K D C H L G L M K I L F S S Y E Y K N --- I A S --- I P R S K Q T W N D C L R R V G S K  
 AT2G04031 LHEDYILA C P K P S S K ---- D D E I F N N M L D G T --- T P V T N E C H D I L K T K D C H L A L V K I I F S T N D Y K K --- I A S K A I P K S K Q T W N D C V R R V G M E  
 AT2G04041 LHEDYILA C P K P S S K ---- D D E I F N N M M D G T --- T P V T S E C R D I L K T K D C H L A L V K I V F S T D G Y K S --- K A S R A I P K S K Q T W N D C V R R V G S K  
 AT2G04037 LHEDYILA C P K P S S K ---- D D E I F Q N M L D G T --- T P V T N E C L D I L K T K D C H L A L V K I I F S T D D Y K N --- I A S R A I P K S K Q T W N D C A R R V S K E  
 AT1G52970 RRIKFLQD S D M S S K ---- N V E M T E G L I D D --- K P V S E D C V N F L K I R E C H E G L M T F V F A T Y E L K D --- V A S A I L P R S K R M N K N C V E T T A A K  
 AT3G30247 KQKEYLLN S I M D I P D - P D K I E E V L A E I I Q N --- K S A S R D C L G I V K A K E C H M E Y M K L I F Q I Y Q L R R --- F T S K R F S K T N E I W K R C S T I G A V  
 AT3G29797 KQKEYLLN S K M D V P --- D K I E E V L A E I I Q N --- K S A S R D C L G I V K A K E C H M E Y M K L F F Q I Y Q L R R --- F T S K R F S K A N E I W N R C F T E I G A V  
 AT2G21655 KQINYLNN S K M A V P --- D K I E E V M A E I I Q N --- K S A S R D C L G I V K A K E C H M E Y M K L F F Q M Y L R R --- F T S K R F S K T N E I W N R C S T E I G V Y  
 AT2G21727 K E K D Y L K N C G K M D M P Y G P Y Q A D E V I A Y I V Q N --- K S V S R V C W G I V K A K E C H K K W T G L F F E M Y Q L R R --- F S S K K F S K T N E I W N M C S T D N ---  
 AT2G25482 K H L K Y L L D C A V M G A G G --- N E I E I R D V F S R N --- K S F S K D C R V L V K G R K Y T E W M K M F F Q F Y Q L N R --- F S S N A M I K T N E T A N K C S N G T E S I  
 AT5G42955 E A T L L W N T C L V K I T P K --- A L D I I A A V F E N --- G T M P D P C K D L V K E K V C H D T L I K Y I A D K P M L I A --- H E T E Y L K K S D D L W N H C V S I S K S A  
 AT5G42957 E A T L L W N T C F V K I T P K --- A L D I I A A V F E N --- G T M P D P C K D L V K E K M C H D T L I K Y I A D K P M L I A --- H E R E Y L K K S D D L W N H C V S I S K I S  
 AT3G30385 E A N L L W K T C L V K I T P K --- A L D I I A A V F E N --- G T M P D P C N D L V K E K V C H D T L I K Y I A D K P M L I A --- H E T E Y L K K S D D L W N H C F S I S E S A  
 AT3G30387 E A N L L W K T C L V K I T P K --- A L D I I A A V F E N --- G T M P D P C N D L V K E K V C H D T L I K Y I A D K P M L I A --- H E T E Y L K K S D D L W N H C F S I S E S A  
 AT3G30383 E A N L L W K T C L V K I T P K --- A L D I I A A V F E N --- G T M H D P Y N D L V K E K V C H D T L I K Y I A D K P M L I A --- H E T E Y L K K S D D L W N H C V S I S K S A  
 AT5G34882 E A N L L W N T C L V K I T L K --- A L D I I A A V L K N --- G T M P D P Y N D L V K E K V C H N T L I K Y I A D K P M L I A --- H E T E Y L K K S D D L W N H C V S I S K S A  
 AT5G42567 E A N L L W N T C L V K I T P K --- A L D I I V A A V F E N --- G N M P D P C N D L V K E K V C H D T L I K Y I A N K P M L I A --- H E T E Y L K K S D D L W N H C V S I S K S A  
 AT5G34887 E A N L L W N T C L V K I T P K --- A L D I I V V V F E N --- G T M P D P C N D L V K E K V C H D T L I K Y I A D K P M L I A --- H E T E Y L K K S D D L W N H C V S I S K S A  
 AT5G34881 E A N L L W N T C L V K I T P K --- A L D I I V V V F E N --- G T M P D P C N D L V K E K V C H D T L I K Y I A D K P M L I A --- H E T E Y L K K S V D L S K H C V S I S K S A  
 AT5G34905 E A N L L W N T C L V K I T P K --- A L D I I V A V F E N --- G T M P D P C N D L V K E K V C H D T L I K Y I A D K P M L I A --- H E I E Y L K K S D D L W N H C V S I S K S A  
 AT5G34885 E A N L L W N T C L V F T P K --- A L D I I A A V F E N --- G T M S D P C N D L V K E K V C H D T L I K Y I A D K P M L I A --- H E T E Y L K K S D D L W N H C V S I S K S A  
 AT5G34883 E A N L L W N T C L V F T P K --- A L D I I A A V F E N --- G T M P D P C N D L V K E K V C H D S L I K Y I A D K P M L I A --- H E T E Y L K K S D D L W N H C V S I S K S A  
 AT5G34908 E A N L L W N N C L V K I T P K --- A L D I I A A V F E N --- G T M S D P L Q R L L R D --- I S Y S S --- S V C R D ---  
 AT1G57775 E A K S L W N T C L V K I T P K --- A L N I I Y V V F G N --- G T L I E S C H D L V Q E K V C H D N L I K Y I A D R P S L I S --- R E T Q F L K K R D D V W N H C V S I S K T A  
 AT1G57777 E A K S L W N T C L V K I T P K --- A L N I I Y V V F G N --- G T L I E S C H D F V Q E K V C H D N L I K Y I A D R P S L I G --- R E I Q F L K K R D D V W N H C V S I S K T A  
 AT1G57760 E A K S L W N T C L V K I T P K --- A L N I I Y V V F G N --- G T L I E S C H D L V Q E K V C H D N L I K Y I A D R P S L I G --- R E T Q Y L K K R D D V W N H C V S I S K T A  
 AT1G45221 E A K S L W N T C L V K I T P K --- A L N I I Y V V F G N --- G T L I E S C Y D L V Q E K V C H D N L I K Y I A D R P S L I G --- R K A Q Y L K K R D D V W N H C V S I S K T A  
 AT1G45215 E A K S L W N T C L V K I T P K --- A L N I I Y V V F G N --- G T L I E S C Y Y L V Q E K V C H D N L I K Y I A D R P S L I G --- R K A Q Y L K K R D D V W N H C V S I S K T A  
 AT1G45223 E A K S L W N T C L V K I T P K --- A L N I I Y V V F G N --- G T L I E S C H D L V Q E K V C H D N L I K Y I A D R P S L I G --- R E A Q Y L K K R D D V W N H C V S I S K T A  
 AT3G44115 E A K S L W D T C L V K I T P K --- A L N I I A V V F G N --- G T L I E S C H D L V Q E K V C H D N L I K Y I A D R P S L I G --- R E T Q Y L K K R D D V W N H C V S I S K T A  
 AT4G08025 E A K S L W D T C L V K I T P K --- A L N I I A V V F G N --- G T L I E S C K D L V Q E K V C H D N L I K Y I A D R P S L I G --- R E T Q Y L K K R D D V W N H C V S I S K T A  
 AT4G07515 E A K S L R D T C L V K I T P K --- A L N I I T V V F G N --- G T L I E A C N D L V Q E K V C H D N L I K Y I A D R P S L I G --- R E T Q Y L K K R D V W N H C V S I S K T A  
 AT3G01185 E L V Q F A G T C A G L M G G E K --- S D Q V M S E I I Q N --- I P T S R Y C L K M I I Y Q E C H M V L R N L L F Q T Y Y Y K P --- F A S K G R P R I L K V W N R C S A E V G G F  
 AT3G56610 E S D H L V N K C M A L S S R --- A M Y V T D A I C T I H G P M R L K H H G C L E V F H M R A L K I V T N H V I Q M F L P K F E G V R K Q Y S L E K S T Y I M Q L V P V L T I S

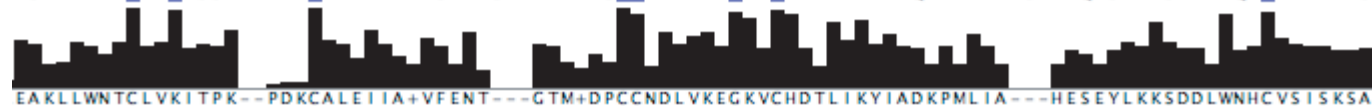

B

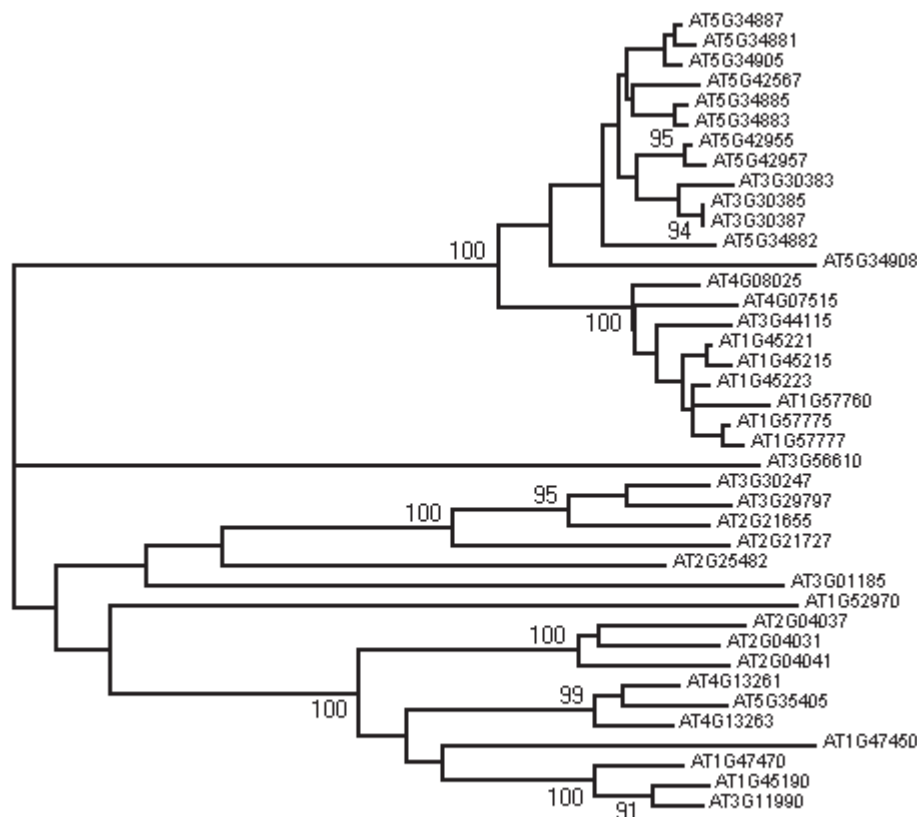

0.1
