# Supplementary material
Source: PubMed Central journal article supplement (PMC2041986)
Supplement: pgen.0030171.sg004.pdf [file pgen.0030171.sg004.pdf]

*dif1* down-regulated  
whole genome tiling array  
(this work)

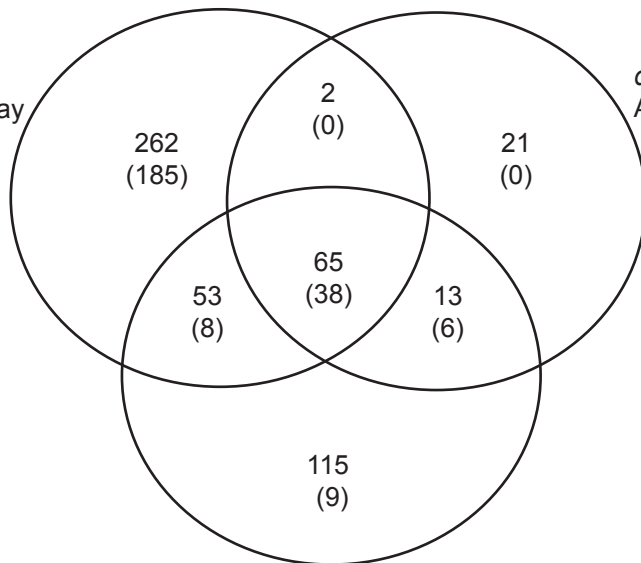

*dif1* down-regulated  
ATH1 array (Steffen et al.)

*spl/nzz* down-regulated  
ATH1 array (Yu et al.)
